# Supplementary material for: What proportion of initially prescribed antidepressants is still being prescribed chronically after 5 years in general practice? A longitudinal cohort analysis
Source: PubMed Central journal article supplement — BMJ Open. 2019 Feb 5;9(2):e024051. doi: 10.1136/bmjopen-2018-024051 (PMC6377556; doi:10.1136/bmjopen-2018-024051), 2019-02-05
Supplement: bmjopen-2018-024051supp001.pdf [file bmjopen-2018-024051supp001.pdf]

**Table 1.** Odds for receiving an SSRI prescription each year between 2011 and 2015

| <b>Variable</b>                              | <b>Coefficient</b> | <b>Standard Error</b> | <b>p-value</b> | <b>Odds ratio</b> | <b>95% Confidence Interval</b> |      |
|----------------------------------------------|--------------------|-----------------------|----------------|-------------------|--------------------------------|------|
| <b>Sex (male = ref)</b>                      |                    |                       |                |                   |                                |      |
| Female                                       | 0.1699             | 0.0576                | 0.0032         | 1.19              | 1.06                           | 1.33 |
| <b>Age (65+ = ref)</b>                       |                    |                       |                |                   |                                |      |
| 19–44                                        | -0.1077            | 0.0767                | 0.1600         | 0.90              | 0.77                           | 1.04 |
| 45–64                                        | 0.2582             | 0.0700                | p < .001       | 1.29              | 1.13                           | 1.49 |
| <b>Disorder</b>                              |                    |                       |                |                   |                                |      |
| Anxiety (no anxiety = ref)                   | 0.0333             | 0.0771                | 0.6656         | 1.03              | 0.89                           | 1.20 |
| Depression (no depression = ref))            | -0.1207            | 0.0698                | 0.0838         | 0.89              | 0.77                           | 1.02 |
| Somatic disorder (no somatic disorder = ref) | 0.1537             | 0.0849                | 0.0703         | 1.17              | 0.99                           | 1.38 |
|                                              |                    |                       |                |                   |                                |      |
| <b>Practice variance</b>                     | 4.711              | 0.626                 |                |                   |                                |      |
| <b>ICC</b>                                   | 0.59               |                       |                |                   |                                |      |
| <b>Constant</b>                              | -3.6397            | 0.2066                |                |                   |                                |      |

**Table 2.** Odds for receiving a TCA prescription during each year between 2011 and 2015

| <b>Variable</b>                              | <b>Coefficient</b> | <b>Standard Error</b> | <b>p-value</b> | <b>Odds ratio</b> | <b>95% Confidence Interval</b> |      |
|----------------------------------------------|--------------------|-----------------------|----------------|-------------------|--------------------------------|------|
| <b>Sex (male = ref)</b>                      |                    |                       |                |                   |                                |      |
| Female                                       | 0.2030             | 0.0917                | 0.0268         | 1.23              | 1.02                           | 1.47 |
| <b>Age (65+ = ref)</b>                       |                    |                       |                |                   |                                |      |
| 19–44                                        | -0.6821            | 0.1300                | p < .001       | 0.51              | 0.39                           | 0.65 |
| 45–64                                        | 0.0393             | 0.0915                | 0.6673         | 1.04              | 0.87                           | 1.24 |
| <b>Disorder</b>                              |                    |                       |                |                   |                                |      |
| Anxiety (no anxiety = ref)                   | 0.2098             | 0.1387                | 0.1303         | 1.23              | 0.94                           | 1.62 |
| Depression (no depression = ref)             | 0.3797             | 0.1137                | p < .001       | 1.46              | 1.17                           | 1.83 |
| Somatic disorder (no somatic disorder = ref) | -0.0631            | 0.1098                | 0.5654         | 0.94              | 0.76                           | 1.16 |
|                                              |                    |                       |                |                   |                                |      |
| <b>Practice variance</b>                     | 2.763              | 0.4156                |                |                   |                                |      |
| <b>ICC</b>                                   | 0.46               |                       |                |                   |                                |      |
| <b>Constant</b>                              | -3.6022            | 0.1936                |                |                   |                                |      |
